# Supplementary material for: Isoprenoid emission response to changing light conditions of English oak, European beech and Norway spruce
Source: Copernicus journal article supplement (doi:10.5194/bg-14-4045-2017), 2017-09-15
Supplement: Supplementary file 1 [file bg-14-4045-2017-supplement.zip]

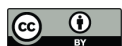

*Supplement of*

**Isoprenoid emission response to changing light conditions of English oak,  
European beech and Norway spruce**

**Ylva van Meeningen et al.**

*Correspondence to:* Ylva van Meeningen ([ylva.van\\_meeningen@nateko.lu.se](mailto:ylva.van_meeningen@nateko.lu.se))

- [bg-14-4045-2017-supplement-title-page.pdf](#)
- [Figure\\_1-3.xlsx](#)
- [Figure\\_4.xlsx](#)

The copyright of individual parts of the supplement might differ from the CC BY 3.0 License.
